# Supplementary material for: Engineering TadA ortholog-derived cytosine base editor without motif preference and adenosine activity limitation
Source: PubMed Central journal article supplement — Nat Commun. 2024 Sep 16;15:8090. doi: 10.1038/s41467-024-52485-1 (PMC11405849; doi:10.1038/s41467-024-52485-1), 2024-09-16
Supplement: 41467_2024_52485_MOESM3_ESM.pdf [file 41467_2024_52485_MOESM3_ESM.pdf]

## Description of Additional Supplementary Files

**File Name:** Supplementary Data 1

**Description:** Protein and Reporter sequences in this study.

**File Name:** Supplementary Data 2

**Description:** Primers, targets and corresponding amplicon used for evaluating editing efficiency at endogenous loci in this study.

**File Name:** Supplementary Data 3

**Description:** Primers and corresponding amplicons for Cas9-dependent off-target sites.

**File Name:** Supplementary Data 4

**Description:** Primers, target and AAV vectors for in vivo editing study.
